# Supplementary material
Source: MDPI journal article supplement (https://www.mdpi.com/2674-1164/2/4/38)
Supplement: s1 [file s1]

**Supplement Table S1.** Summary of primers used for conventional PCR and Real time PCR.

| Title 1                                                  | Title 2                         | Title 3                                  |
|----------------------------------------------------------|---------------------------------|------------------------------------------|
| Fowl Adenovirus                                          | FADV H1 <sup>a</sup>            | 5'-tggacatgggggacga-3'                   |
|                                                          | FADV H2 <sup>a</sup>            | 5'-aagggtgacgttgc-3'                     |
| Avian Reovirus                                           | ReoV-P1 <sup>b</sup>            | 5'-agtattgtgagtagc-3'                    |
|                                                          | ReoV-P2 <sup>b</sup>            | 5'-gatactgtcattgactcga-3'                |
| <i>Mycoplasma spp</i>                                    | Myco-F1 <sup>c</sup>            | 5'-acaccatgggag(c/t)tggtat-3'            |
|                                                          | Myco-R1 <sup>d</sup>            | 5'-cttc(a/t)tcgactt(c/t)cagaccaaggcat-3' |
|                                                          | Myco-FN2 <sup>e</sup>           | 5'-acctccttctacggagtacaa-3'              |
|                                                          | Myco-R2 <sup>c</sup>            | 5'-gcatccacca(a/t)a(a/t)ac(c/t)ctt-3'    |
|                                                          | Myco-FN3 <sup>e</sup>           | 5'-tatttgctattcagtttcaaagaac-3'          |
|                                                          | Myco-RN3 <sup>e</sup>           | 5'-gggggtgaagtcgtaacaaggat-3'            |
| ILTV – conventional PCR                                  | gB-BNCU158 <sup>f</sup>         | 5'-caatcctacatgccgtgaac-3'               |
|                                                          | gB-BNCL2854 <sup>f</sup>        | 5'-cgcaaatgatggcagactga-3'               |
| ILTV – qPCR                                              | qPCR-UL 44-Probe <sup>g</sup>   | FAM-cagctcggtagccattcta-BHQ1             |
|                                                          | qPCR-UL 44-F <sup>g</sup>       | ccttgcggttgaattttctg                     |
|                                                          | qPCR-UL 44-R <sup>g</sup>       | ttcgtgggttagaggctctgt                    |
| <i>Gallus gallus domesticus</i> -<br>$\alpha$ 2-Collagen | qPCR- $\alpha$ 2-Collagen-Probe | TxR-cccttaactgagttccccagctactgcag-BHQ2   |
|                                                          | qPCR- $\alpha$ 2-Collagen-F     | 5'-gggaactggagaaccaatttt-3'              |
|                                                          | qPCR- $\alpha$ 2-Collagen-R     | 5'-cgtgccgctgtctctacat-3'                |

<sup>a</sup> Raue and Hess 1998; <sup>b</sup> Shapouri et al 1995; <sup>c</sup> Harasawa et al 1993; <sup>d</sup> Nakagawa et al., 1992; <sup>e</sup> Sung et al., 2006;

<sup>f</sup> Unpublished; <sup>g</sup> Callison et al 2007; <sup>h</sup> Islam et al 2004.
